# **Nucleolar NOC1 controls protein synthesis and cell competition in *Drosophila***

Francesca Destefanis <sup>1\*</sup>, Valeria Manara <sup>1\*</sup>, Stefania Santarelli <sup>1\*</sup>, Sheri Zola <sup>1</sup>, Marco Brambilla <sup>2</sup>, Giacomo Viola <sup>2</sup>, Paola Maragno <sup>1</sup>, Gabriella Viero <sup>3</sup>, Maria Enrica Pasini <sup>2</sup>, Marianna Penzo <sup>5-6</sup> and Paola Bellosta <sup>1,2,4,7</sup>

1- Department CIBIO, University of Trento, Via Sommarive 9, 38123 Trento

2- Department of Biosciences, University of Milano, Via Celoria 25, 20133 Milano

3- Institute of Biophysics, CNR, Via Sommarive 18, 38123 Trento

4- Department of Medicine NYU-Langone Med Center, 550 First Avenue, 10016, NY

5- Department of Experimental, Diagnostic and Specialty Medicine, University of Bologna, Via Massarenti 9, 40138 Bologna

6- Center for Applied Biomedical Research, University of Bologna, Via Massarenti 9, 40138 Bologna

7- corresponding author: [paola.bellosta@unitn.it](mailto:paola.bellosta@unitn.it)

\* equally contributed

**running title** NOC1, nucleolus and growth

## **summary statement**

NOC1 is a nucleolar protein necessary for the general control of protein synthesis and cellular growth. In vivo NOC1 expression is required for the correct development of the animal.

## Abstract

*NOC1* is a nucleolar protein necessary in yeast for a correct transport of the large ribosomal subunit and ribosome biogenesis. Here we shown that ubiquitous downregulation of *NOC1* in *Drosophila* results in defective polysome formation and decreases the rate of protein synthesis. Reduction of *NOC1* is detrimental for animal growth and adequate expression of *NOC1* in organs, such as the prothoracic gland and in the fat body is necessary for proper organ function. In the imaginal discs downregulation of *NOC1* results in small cells that die by apoptosis. This event is rescued in *M/+* background suggesting that cells with reduced of *NOC1* are outcompeted by wild type cells because of their reduced protein synthesis. *NOC1* downregulation induces the upregulation of the pro-apoptotic *eiger*-JNK signaling pathway, that results in the activation of *DILP8* compensatory mechanism. Our results demonstrate that *NOC1* in *Drosophila* plays an important role in the regulation of protein synthesis and cell survival, linking its function in the nucleolus to the control of animal growth and development.

**Keywords 3-6:** *Drosophila*, *NOC1*, cell competition, apoptosis, *eiger*, *DILP8*

## Introduction

The NOCs are a large family of nucleolar proteins that play a critical role in the control of protein synthesis and ribo-biogenesis in yeast and plants (Edskes et al., 1998; Li et al., 2009). *NOC1*, *NOC2* and *NOC3* are necessary for the correct transport and assembly of the rRNA complexes and maturation of the ribosomal subunits (Dlakic and Tollervey, 2004; Hierlmeier et al., 2013). These proteins are characterized by their ability to form heterodimers via an amino acid stretch, called the NOC-domain, that is present in many of the members of this family (Hierlmeier et al., 2013; Milkereit et al., 2001). NOCs are highly conserved in all eukaryotes and studies in yeast *S. cerevisiae* reveal that *Noc1*, also called *MAK21*, forms heterodimers with *Noc2* that are necessary for the transport and maturation of the pre-ribosomal 60S subunit, while *Noc3*, bound to *Noc2*, forms complexes that are required for the transport of the 60S subunit into the cytoplasm. *Noc1*, 2 and 3 do not complement with each other, and their roles are essential for life, as mutations in

*S cerevisiae* and in *Arabidopsis*, where NOC1 is also called *Slow walker2*, affects growth and viability (Edskes et al., 1998; Li et al., 2009; Milkereit et al., 2001).

In *Drosophila*, growth occurs during larval development where the proper increase in cell mass and animal size is highly dependent on efficient ribosome biogenesis (Texada et al., 2020). Mutations in genes that regulate this process, like those encoding for ribosomal proteins of the *Minute* family (Marygold et al., 2007; Saeboe-Larssen et al., 1998) or components of the nucleolus like *Nop60b/Dyskerin* (Tortoriello et al., 2010) and *Nopp140* (Baral et al., 2020), present common defects, including a delay in development and reduced body size. Similar phenotypes have also been described for mutations in genes that control rRNA synthesis such as *Rpl-135* subunit of the RNA-Pol-I complex (Grewal et al., 2005), and for *diminutive (dm)* the gene encoding for MYC (Johnston et al., 1999), a known master regulator of ribosome biogenesis both in *Drosophila* and in vertebrates (Barna et al., 2008; Destefanis et al., 2020; Grewal et al., 2005; van Riggelen et al., 2010).

Larval growth is also regulated by hormones and growth factors released by non-autonomous signals and controlled by the fat body that works as sensor to coordinate the release of the *Drosophila* insulin-like peptides DILPs (DILP2, 3 and 5) from the Insulin Producing Cells (IPCs) in the brain in response to nutrient availability (Geminard et al., 2009; Koyama et al., 2020; Maniere et al., 2020). This process is also coordinated by peaks of ecdysone released at specific times during development to control molting and metamorphosis (Nijhout et al., 2014). If animals are in distress or if their organs are damaged, the level of ecdysone, produced by the prothoracic gland (PG) is reduced by DILP8, a peptide secreted by the damaged cells to activate the Leucine-rich repeat, containing the G protein-coupled receptor-3 (Lgr3) in the brain that blocks ecdysone synthesis (Colombani et al., 2015; Garelli et al., 2015; Vallejo et al., 2015). Thus DILP8, by decreasing the rate of animal development, allows regeneration of the damaged tissue, a process that has been conserved during evolution to control and assure correct organ growth and animal bilateral symmetry (Boulan and Leopold, 2021). DILP8 upregulation is induced by signaling produced by the dying cells, and in turn its activation has been associated with multiple pathways including p53, Xrp1 and the JNK/eiger/TNF $\alpha$  signaling

pathways (Akai et al., 2021; Boulan et al., 2019; Ji et al., 2019; Lee et al., 2018; Sanchez et al., 2019) through mechanisms still not completely understood.

In *Drosophila*, the orthologues of yeast *Noc1*, *Noc2* and *Noc3* are annotated as *CG7839*, *CG9246* and *CG1234* respectively. In this study we demonstrate that these genes, hereinafter called *NOC1*, *NOC2* and *NOC3*, play a central role in the control of cellular and animal growth; and their reduction is detrimental for animal development. In particular we show for *NOC1* that while its overexpression increases polysomal abundance and is dispensable in differentiated tissues, its ubiquitous reduction results in reduced protein synthesis and defective ribosomal biogenesis. In line with these results, reducing *NOC1* in different organs compromises their activity. Moreover, in cells of the imaginal disc, reduction of *NOC1* induces apoptosis that is rescued in a *Minute/+* background suggesting that *NOC1* activity may have a role in the control of cell competition. *NOC1*-RNAi dying cells activate the *eiger/JNK* signaling pathways which results in the upregulation of *DILP8* and a delay in animal development. In summary, our results show that *NOC1* is a novel nucleolar component that functions in *Drosophila* to control cell growth and survival, a step forward in understanding new mechanisms that link protein synthesis to animal development.

## Results

### ***Drosophila* *NOC1* is necessary for animal growth.**

Our transcriptome analysis in cells of the wing imaginal discs identify *NOC1*, *NOC2* and *NOC3*, as nucleolar genes that present a similar expression pattern as *MYC*, suggesting that they may contribute to its function. *NOCs* genes are evolutionary conserved and their amino acid sequences share between 32 to 35% homology with the human orthologue proteins (Fig. 1A, Fig. S1). Interestingly, network analysis using the STRING database on predicted protein-protein interactions for *NOC1/CG7839* uncovers that all three *NOC* proteins form a hub with other nucleolar proteins which play important roles in ribosomal biogenesis, suggesting that they may work in concert to ensure proper nucleolar function (Fig. 1B, C).

To investigate the role of NOCs *in vivo* in *Drosophila*, we initially evaluated the effects of their expression in the whole larvae using the ubiquitous *actin* promoter. This analysis shows that overexpression of NOC1 leads to small larvae (Fig. 1D, E) that reach pupariation, but fail to become adults (Table 1). On the contrary, NOC1, 2 or 3 downregulation of the respective *mRNAs* significantly reduces larval size (Fig. 1D, E) resulting in lethality between first and second instars (Table 1). qRT-PCR analysis shows the level of *NOC1-mRNA* overexpression and the efficiency of NOCs RNA interference (Fig. 1F). We then analyze if the overexpression of NOC1 could complement for the reduction of NOC2 and NOC3 in whole larvae. This analysis shows that NOC1 overexpression was able to fully rescue the lethality only of *NOC1-RNAi* larvae (Fig. 1A inset, and Fig. S2), suggesting that it exerts a unique function that does not complement for the loss of NOC2 and NOC3.

In yeast, mutations in NOCs genes affect ribosome biogenesis. To thoroughly investigate whether this function is also conserved in *Drosophila*, we analyzed whether the expression of NOC1 could impact the correct synthesis or production of ribosomal subunits and polysomes. Polysomal profiling from whole larvae, shows that NOC1 overexpression results in a small increase of the 80S subunit and in polysomes as compared to the profile in wild type larvae (Fig. 1G-H). On the contrary, reduction of NOC1 causes an overall decrease in ribosomal subunits, ribosomes, polysomes abundance (Fig. 1G-I), and leads to an accumulation of the 40S and 60S subunits (not shown). We then evaluated whether NOC1 overexpression and its downregulation could affect general protein synthesis. To analyze the rate of protein synthesis we performed a WB SUnSET (Surface Sensing of Translation) assay (Deliu et al., 2017) on lysates from larval tissues incubated with the inhibitor of translation puromycin. Differences in the puromycin-labelled peptides is proportional with the changes in translation and is visualized by western blot using anti puromycin antibodies. These experiments show that larvae with a reduced NOC1 level have a significant reduction in the rate of labeled peptides compared with that of wild type animals (Fig 1J-K). These data indicate that NOC1 is necessary to sustain a proper protein synthesis rate.

Since no functional antibodies are available to localize the endogenous NOC1 protein, we overexpressed an HA tagged form in cells of the wing imaginal disc. This analysis shows that HA-NOC1 colocalize with the nucleolar protein fibrillarin (Fig.

1L) and to large nuclear granules. Western blot analysis using lysates from whole larvae shows that ubiquitous overexpression of HA-NOC1 results in a protein of about 132 KDa (Fig. 1M), in addition, several other bands of lower molecular weight are visualized by HA antibody. These truncated forms may be the result of proteolysis processes induced by toxicity since overexpression of NOC1 at this stage of development starts to be detrimental for the animal (Table 1).

**Table 1: Characterization of NOC expression *in vivo* using different promoters**

| Promoter          | transgene                             | larval stage         | pupal stage                                        | adult                     |                                |
|-------------------|---------------------------------------|----------------------|----------------------------------------------------|---------------------------|--------------------------------|
| whole body        | <i>actin</i> <sup>1</sup>             | NOC1 OE              | vital                                              | vital                     | -                              |
|                   |                                       | NOC1-RNAi            | dead at second instar small size                   | -                         | -                              |
|                   |                                       | NOC2-RNAi            | dead at second instar small size                   | -                         | -                              |
|                   |                                       | NOC3-RNAi            | dead at second instar small size                   | -                         | -                              |
|                   |                                       | NOC1-RNAi<br>NOC1 OE | vital total rescue of the larval size <sup>2</sup> | vital                     | vital                          |
| neurons           | <i>elav</i>                           | NOC1 OE              | vital                                              | vital                     | vital, no eye defects          |
|                   |                                       | NOC1-RNAi            | delayed                                            | lethal                    | -                              |
|                   |                                       | NOC2-RNAi            | delayed                                            | lethal                    | -                              |
|                   |                                       | NOC3-RNAi            | delayed                                            | lethal                    | -                              |
| retina            | <i>GMR</i> <sup>3</sup>               | NOC1-RNAi            | vital                                              | vital                     | vital, no eye defects          |
|                   |                                       | NOC1-RNAi            | vital                                              | vital                     | vital, no eye defects          |
|                   |                                       | NOC2-RNAi            | vital                                              | vital                     | vital, no eye defects          |
|                   |                                       | NOC3-RNAi            | vital                                              | vital                     | vital, no eye defects          |
| eye antenna       | <i>tubulin-ey&gt;flp</i> <sup>4</sup> | NOC1 OE              | vital                                              | vital                     | vital, no eye defects          |
|                   |                                       | NOC1-RNAi            | vital                                              | vital                     | vital, small eye, with defects |
|                   |                                       | NOC2-RNAi            | vital                                              | vital                     | vital, small eye, with defects |
|                   |                                       | NOC3-RNAi            | vital                                              | vital                     | vital, small eye, with defects |
| Prothoracic gland | <i>P0206</i> <sup>5</sup>             | NOC1 OE              | vital                                              | vital                     | vital, no defects              |
|                   |                                       | NOC1-RNAi            | delayed, big larvae                                | no pupae                  | -                              |
|                   |                                       | NOC2-RNAi            | delayed, big larvae                                | no pupae                  | -                              |
|                   |                                       | NOC3-RNAi            | delayed, big larvae                                | no pupae                  | -                              |
| fat body          | <i>Cg</i> <sup>6</sup>                | NOC1 OE              | vital                                              | vital                     | increased body size            |
|                   |                                       | NOC1-RNAi            | delayed, partial lethal at L3                      | small pupae mostly lethal | lethal, few escapers *         |
|                   |                                       | NOC2-RNAi            | delayed, lethal at L2/L3                           | small pupae, lethal       | -                              |
|                   |                                       | NOC3-RNAi            | delayed, lethal at L2/L3                           | small pupae, lethal       | -                              |
|                   | <i>FB</i>                             | NOC1 OE              | vital                                              | vital                     | vital, body size not analyzed  |
|                   |                                       | NOC1-RNAi            | delayed, lethal at L3                              | small pupae, lethal       | -                              |
|                   |                                       | NOC2-RNAi            | delayed, lethal at L3                              | small pupae, lethal       | -                              |
| wings             | <i>MS1096</i> <sup>7</sup>            | NOC1 OE              | vital                                              | vital                     | females: wild-type wings;      |
|                   |                                       | NOC1-RNAi            | delayed                                            | vital                     | vital, crumpled wings          |
|                   |                                       | NOC2-RNAi            | delayed                                            | vital                     | vital, crumpled wings          |
|                   |                                       | NOC3-RNAi            | delayed                                            | vital                     | vital, crumpled wings          |
|                   | <i>engrailed</i> <sup>8</sup>         | NOC1 OE              | vital                                              | vital                     | vital                          |
|                   |                                       | NOC1-RNAi            | delayed, lethal **                                 | -                         | -                              |
|                   |                                       | NOC2-RNAi            | delayed, lethal                                    | -                         | -                              |
|                   |                                       | NOC3-RNAi            | delayed, lethal                                    | -                         | -                              |

<sup>1-2</sup> see Fig. 1D, <sup>3</sup> see Fig. 2A-E, <sup>4</sup> see Fig. 2F-J, <sup>5</sup> see Fig. 3, <sup>6</sup> see Fig. 4; <sup>7</sup> see Fig. 6; <sup>8</sup> see Fig 7, \* few escapers are born with small body size using line on the II Chr. \*\* few imaginal discs are found using

the line on the RNAi line on the II-Chr., on the contrary, almost no wing imaginal discs are found using the RNAi line on the III Chr. (see Fig. S3).

Overall, these results suggest that NOC1, NOC2 and NOC3 are essential for a correct animal development. In addition, NOC1 expression in the nucleolus must be maintained at a physiological level since its ubiquitous overexpression is lethal at pupariation, while its reduction strongly impairs ribosome biogenesis and protein synthesis.

### **NOC1, NOC2 and NOC3 are necessary for the formation of the ommatidia in the compound eye.**

In order to analyze the function of NOCs in tissues with different proliferative characteristics, we use the *GMR* promoter (Hay et al., 1994) that is expressed from the mid-third instar stage in the differentiated retinal cells of the eye, and the *tubulin* promoter in combination with *eyeless*-flippase (Bellosta et al., 2005) to restrain Gal4 expression in the proliferative cells precursors of eye and antenna discs. These data show that downregulating NOC1, 2, or 3, or overexpressing NOC1, under the *GMR* promoter, does not change the eye morphology (Fig. 2A-E). On the contrary, when using the *tubulin* promoter downregulation of NOC1, 2 and 3 results in small eyes with fewer and disorganized ommatidia (Fig. 2H-J). Overexpression of NOC1 does not affect the eye morphology (Fig. 2G). These results suggest a role for the *NOCs* genes in proliferating cells as their reduction late in development in differentiated cells, does not have any effect.

To further characterize the role of NOCs in vivo we evaluated the impact of the downregulation or overexpression of NOC1 in specific organs fundamental for animal physiology and in the control of animal growth.

### **Reduction of NOC1 in the prothoracic gland controls cell size and affects ecdysone levels inhibiting pupariation.**

Downregulation of the NOC genes in the prothoracic gland (PG), using the *P0206-Gal4* promoter, results in a strong delay in larval development. These animals reach their third instar stage, do not pupariate and continue to grow for about 20 days



before dying. Morphological analysis of the PG revealed that at 5 days AEL its size is similar in *NOC1-RNAi* and in control animals, while in *NOC1-RNAi* larvae its size is strongly reduced at 12 days AEL (Fig. 3A-C). Cells of the PG are specialized for the production of ecdysone, thus we checked its levels by analyzing the expression of its target *Ecdysone-induced protein 74B (E74B)* (Valenza et al., 2018). This analysis shows that in *NOC1-RNAi* animals, *E74B mRNA* was strongly reduced already at 5 days AEL and at 12 days was further reduced (Fig. 3D). As expected, the overall size of these animals increased over time (Fig. 3F), and so did the size of their fat bodies measured at 12 days AEL (Fig. 3E) and the content of fats (not shown). *NOC1* overexpression did not lead to detectable changes in *E74B mRNA* expression (Fig. 3D), nor to changes in the size of the fat body cells (Fig. 3E).

### ***NOC1* downregulation in the fat body reduces cell size and induces dyslipidemia.**

*NOC1*, 2, or 3 downregulation in clones in the fat body affects cell morphology and significantly reduces the size of the cells compared to those from wild type animals (Fig. 4A, C-E, F). *NOC1* overexpression however does affect cell morphology, but we observed a slight significant reduction in the size of the cells resulting in an overall decrease of the area of the clones (Fig. 4B, F). To investigate the impact of *NOC1* in the whole organ, we used the *Cg (Collagene4a1)* promoter (Fig. 4G-R) that is expressed in the fat body and in hemocytes, and the *FB* promoter that is specific only for the fat cells. Reduction of *NOCs*, with both promoters, results in larvae with a small body size that display a delay in development and die either at late larval or pupal stages (Table 1). We noticed that the delay in development was less pronounced using the line *NOC1-RNAi<sup>II</sup>* (on the II Chr.), where a small percentage of animals (less than 10%) hatched as small adults (Fig. 4H, Table 1), possibly because this line is less efficient at reducing endogenous *NOC1-mRNA* (Fig. S3). Analysis of the fat content, using Nile-red, shows that *NOC1-RNAi<sup>III</sup>* larvae (Fig. 4I-L) have less lipids compared to wild type animals (Fig. 4M-P). This was particularly visible at the site of the salivary glands (sg) where the fat body associated with them, is almost absent while in wild type animals is quite prominent (Fig. 4J and N, arrow). As a response for the reduced capability to store lipids, these animals suffer from dyslipidemia, an inter-organ process usually induced by the failure of fat cells to



store lipids. Cells with reduced or impaired fat metabolism produces aberrant lipid molecules that non-autonomously induce the accumulation of lipids in other organs (Palm et al., 2012). Indeed, *NOC1-RNAi* animals unexpectedly accumulated lipids in the wing imaginal discs (Fig. 4M), in the gut (Fig. 4O) and in the brain (Fig. 4P).

The fat body remotely controls the released of *Drosophila* insulin like peptides (DILP2, 3 and 5) from the Insulin Producing Cells (IPCs). When larva have access to adequate nutrients, the fat body produces signals to trigger the release of DILPs from the IPCs, while during starvation these signals are absent and DILPs accumulate in the IPCs (Geminard et al., 2009). Analysis of DILP2 expression in the IPCs from animals with reduced *NOC1* in the fat body, shows that even in adequate nutrients conditions (FED) DILP2 is retained in these cells (Fig. 4Q-R). This suggest that the signals that control DILPs secretion are lost in the fat cells and reduction of *NOC1* mimics animals in starvation where DILPs would ordinarily be retained. On the contrary, overexpression of *NOC1* leads to an increase in larval volume at 96 hours AEL. This effect was less significant at 120 hours; nevertheless, adults hatched at a slightly bigger size than control, as shown by analysis of their wing size (Fig. 4H).

### ***NOC1* is necessary for growth and survival of cells in the wing imaginal disc.**

To assess the impact of *NOC1* in the growth of epithelial cells we generated random clones co-expressing GFP and analyzed how *NOC1*, 2 or 3 downregulation or *NOC1* overexpression affects their growth, cell size and survival in the wing imaginal discs. *NOC1* expressing clones develop to the same size as controls expressing only GFP (Fig. 5A-B, J). On the contrary, downregulation of *NOCs* caused a significant reduction in the dimension of the clones (Fig. 5C-E, J). A further analysis using only *NOC1-RNAi* shows that very few clones were visible when induced at 48 hours AEL suggesting that these cells died and were outcompeted by the neighboring cells (Fig. 5F-G, H). Therefore, we checked whether the expression of the inhibitor of apoptosis p35, along with *NOC1* downregulation, could rescue the size of the clones and to visualize *NOC1-RNAi* cells early before being outcompeted, we induced the clones at 72 hours AEL. With these experimental conditions we were able to visualize small *NOC1-RNAi* clones, composed of very

few cells. The size of these clones was overall 15% of the size of wild type GFP clones, considered 100% (Fig. 5K-L, I), and co-expression of p35 was able to partially rescue *NOC1-RNAi* clonal-size up to 60% (Fig. 5M, I).

These results suggest that cells with reduced NOC1 were subjected to cell competition, a mechanism described for nucleolar components like *NOP60b/Dyskerin* (Tortoriello et al., 2010) and *Nopp140* (Cui and DiMario, 2007), and for *Minutes* proteins (Akai et al., 2021; Baumgartner et al., 2021; Lee et al., 2018; Nagata and Igaki, 2018; Recasens-Alvarez et al., 2021), where the reduction of biosynthetic activity induces the mutant cells to acquire the characteristics of “loser cells” that are outcompeted by neighboring “winner” wild-type cells and die via apoptosis. To analyze if NOC1 could regulate cell competition by controlling protein synthesis we induced *NOC1-RNAi* clones in a *Minute(3)66D/+* background. These data show that in conditions of systemically reduced protein synthesis *NOC1-RNAi* clones are partially rescued in size and number (Fig. 5N-O) acquiring then a growth advantage in condition of partial reduced protein synthesis.

These results suggest a novel role for NOC1 in the control of the biosynthetic activity of the cells as its reduction transforms cells into "losers" that die by apoptosis in a cell competition environment.

### **Reduction of NOC1 in cells of the imaginal discs induces the pro-apoptotic eiger/JNK signaling and upregulation of DILP8, resulting in a delay in larval development.**

To further characterize *NOC1* function in cells of the wing discs, we drove its overexpression and downregulation in the dorsal part of the wing pouch using the *MS1096* promoter (Capdevila and Guerrero, 1994). *NOC1* overexpression does not affect the size of the disc (Fig. 6C), nor alter the timing of larval development (Fig. 6G). Adults hatch with no defects and with wings at a similar size as those of wild type animals (Fig. 6H). On the contrary, reduction of *NOC1* slightly reduces the size of the wing imaginal disc but does not substantially change its morphology (Fig. 6B), adults hatched with defects at the dorsal side of the wings that were also smaller (Fig. 6E, H). The larvae volume was also altered during development, with *NOC1-RNAi* animals being smaller than control (Fig. 6G) and reached pupariation with a

delay (Fig. 6I). Next, we wondered if this delay was linked to an upregulation of DILP8 in response to the cell death caused by the local depletion of NOC1. Analysis of DILP8 expression shows an upregulation of *Dilp8-RNA* in discs from *NOC1-RNAi* animals (Fig. 6J). In agreement with this data, we found a significant increase in *dilp8-GFP<sup>M100727</sup>* reporter in cells with reduced NOC1 expression (Fig. 6K-L). These cells also show an upregulation of the pro-apoptotic gene *eiger*, visualized using the *eiger-GFP<sup>fTRG</sup>* reporter (Fig. 6M-N), that was accompanied with the upregulation of JNK signaling detected using the *TRE-GstD1-RFP* reporter line (Fig. 6O-P). We conclude then that proper NOC1 expression is relevant for the integrity of the epithelial cells of the disc, and its reduction causes nucleolar stress that triggers the pro-apoptotic gene *eiger*, and ultimately the activation of DILP8/Lgr3 compensatory mechanism. Thus, resulting in the reduction of ecdysone and in the delay in development seen in the *NOC1-RNAi* animals.

### **Targeted NOC1 CRISPR-mutation in the posterior compartment of the wing imaginal discs phenocopies NOC1 downregulation induced by RNA interference.**

To develop genomic mutations as useful tools to better study the role of NOC1 and to induce site specific mutations based on the CRISPR-Cas9 system, we used the line *sgRNA<sup>CG7839</sup>* from a library recently developed in Boutros's laboratory to induce site specific mutations based on the CRISPR-Cas9 system (Port et al., 2020). To analyze if the reduction of NOC1 phenocopies the reduction of NOC1 by RNA interference with *engrailed-Gal4*, we used the promoter *hedgehog-Gal4* and drove the expression of *Cas9* in the cells of the posterior compartment of the wing disc together with *sgRNA<sup>CG7839</sup>* and GFP. As shown in Fig. 7, driving mutations in NOC1 using the *hedgehog/Cas9* system compromises and reduces the development of the posterior compartment of the wing disc (Fig. 7B) with similar results as when NOC1 was reduced using *engrailed-Gal4* (Fig. 7D). To compare the efficiency of the two systems, we analyzed the total area of discs and the ratio between the area of the posterior compartment (marked by GFP) and the anterior area, in animals at 120 hours AEL. This analysis shows that in both systems reduction of NOC1 affects the total area of the imaginal discs which is significantly reduced compared to control animals (Fig. 7E, G). The ratio between the posterior and the anterior compartments

was also reduced with a similar extent in both systems (Fig. 7F, H), suggesting that genetic mutations introduced with the line *sgRNA*<sup>CG7839</sup> by CRISPR/Cas9 recapitulate the phenotype induced by *NOC1-RNAi*.

## Discussion

The biogenesis of ribosomes is one of the most complex and energetically demanding processes that takes place primarily in the nucleolus, a distinguishable region of the nucleus where the ribosomal RNA genes (rRNAs) are transcribed into 47S pre-RNA and processed to obtain the 18S, 5.8S and 28S rRNAs. The 18S, together with the ribosomal proteins, is then directed to form the small ribosomal subunit, while the 5.8S and 28S rRNAs with the 5S and specific riboproteins will form the large 60S subunit (Correll et al., 2019). Many factors have been identified, particularly in yeast, that are necessary for the correct transport and assembly of these complexes, including the NOCs factors (Dlagic and Tollervey, 2004; Hierlmeier et al., 2013).

Here we focused on NOC1, NOC2 and NOC3, as their expression in our transcriptome screens was significantly modulated by MYC expression, a known regulator of ribosome biogenesis (Destefanis et al., 2020). The function of NOC1 in *Drosophila* is also not redundant, as we found that *NOC1* does not compensate for the loss of *NOC2* expression (not shown). One possible explanation for the absence of complementarity may relate to NOCs' ability to form heterodimers, which in yeast were shown to be necessary for the transport and maturation of the ribosomal 60S subunit, a function that likely requires the formation of unique complexes in which each NOC has a fundamental structural role.

NOC1 contains a CBP (CCAAT binding protein) domain in its amino-acid sequence suggesting that it may have a role as a transcription factor. This hypothesis is corroborated by metadata (CHIP-Seq and genetic screens) in *Drosophila*, where its expression was associated to promoter regions of genes that control nucleolar activity and ribosomal proteins (Neumuller et al., 2013; Shokri et al., 2019) suggesting that NOC1 may act directly to induce the expression of genes involved in ribosomal biogenesis. A function that may be conserved in humans as shown from a list of selected putative targets for the human homologue CEBPz (or CBF2, CTF2)

(OMIM-612828) in liver and breast tumors, that includes common nucleolar components and ribosomal proteins (Fig. S4). Our data show that upon overexpression NOC1 co-localizes in the nucleolus with fibrillarin (Fig. 1L) and in large granules in the nucleus. Interestingly, a similar localization in nuclear granules has also been described in HeLa cells for the endogenous CEBPz, which is also a member of the CAAT-Binding protein family. CEBPz can activate transcription to control the *Hsp70* promoter (Lum et al., 1990) and it has been shown to play a role in nuclear rRNA processing and 60S transport. Also, the human NOC1/CEBPz proteins contain structural domains which are predicted to mediate protein-protein interactions (Fig. 1A). Overall, these results support the hypothesis that CEBPz may play a similar role to that characterized here in *Drosophila* however no functional data have been obtained yet.

NOC function is necessary for proper animal development. Ubiquitous reduction of NOC1 evidences a clear defect in growth. These animals were smaller and stopped developing at the second instar, and similar results were observed in animals with reduced levels of NOC2 and NOC3 (Fig. 1A). On the contrary, NOC1 ubiquitous expression allows larvae to reach pupariation at a normal rate but they never eclosed as adults. These results suggest a general function for NOC1 in the nucleolus to control fundamental processes that regulate animal growth that may be linked to defects in translation and in protein synthesis. Indeed, we found that reduction of NOC1 reduces protein synthesis as shown by the robust decrease in the rate of puromycin-labeled peptides evidenced by the WB SUnSET assay (Fig. 1J). Moreover, polysome profiling from these larvae also reveals a reduced ribosome abundance (Fig. 1I) and to an accumulation of ribosomal subunits (Fig. S5), suggesting a defective assembling of the ribosomes in these animals. On the contrary, polysome profiling from NOC1 overexpressing larvae shows a small increase in polysomes (Fig. 1H) suggesting that NOC1 plays a role in sustaining the mechanism of translation and protein synthesis.

To have a better indication about NOC1 function in organismal growth, we reduced its expression in organs relevant for *Drosophila* physiology such as the prothoracic gland (PG), fat body (FB) and the imaginal discs.

Prothoracic gland (PG)

Reduction of *NOC1* in the prothoracic gland (PG) results in a significant decrease in cell size (Fig. 3A-C) and in ecdysone production, as indicated by the levels of its target *E74mRNA* (Fig. 3D). Consequently, these animals do not develop into pupae and continue to wander as larvae and eventually die at about 20 days AEL. Their larval size increases, and these animals continue to store fats and sugars in cells of the fat body, that are also augmented in size. We previously described the presence of hemocytes (macrophage-like cells) in the fat bodies of these animals at 12 days AEL, whose migration into the fat depends on the amount of ROS (Radical Oxygen Species) likely released by the fat cells in this stressed condition (Valenza et al., 2018). Interestingly, this inter-cellular mechanism recapitulates chronic low-grade inflammation, or Adipocyte Tissue Macrophage (ATM), described in adipose tissue from obese people (Hornig and Hotamisligil, 2011).

#### Fat body

The reduction of *NOC1*, 2 or 3 levels in clones in the fat body causes cells to be smaller with morphological defects (Fig. 4C-E, F). When *NOC1* is reduced in the whole organ using the *Cg* promoter, the size of the fat body is reduced (Fig. 4I-P). In *Drosophila* the fat body controls growth and development by sensing the amino acid concentration in the hemolymph and remotely controls the release of DILP2,3 and 5 from the Insulin Producing Cells in the brain (Andersen et al., 2013; Geminard et al., 2009; Hyun, 2018). At the same time, the fat body stores fats and sugars to be used via the catabolic process of autophagy to survive metamorphosis (Rusten et al., 2004; Scott et al., 2004). When nutrients are reduced, animals delay their development to allow the fat body to accumulate fat and sugars until larvae reach a critical size that ensures them to proceed metamorphosis (Hironaka et al., 2019; Texada et al., 2020). Reducing *NOC1* in the fat cells alters their ability to store fats and larvae proceed poorly through development (Fig. 4G), however when *NOC1* is reduced by only about 50 % (using an RNAi line that is less efficient S3), some are able to proceed and about 10% reach their critical size to undergo metamorphosis and eclose as small adults (Fig. 4H).

According to these results, animals with reduced *NOC1* in the fat body mimic conditions of low nutrients; indeed, we show DILP2 accumulation in the IPCs. A

condition described before for animals undergoing starvation or with reduced MYC levels that impaired fat metabolism (Geminard et al., 2009; Parisi et al., 2013). Interestingly, we also observed that *Cg-NOC1-RNAi* animals abnormally accumulate fats in other organs such in the gut, brain, and in the wing imaginal discs. These findings suggest that these animals exhibit inter organ dyslipidemia, a mechanism of lipid transport active when the fat body is impaired and releases non autonomous signals for the other organs to store fats. A similar process was previously described for mutations in lipoproteins of the *APOE* family in *Drosophila* (Palm et al., 2012). Interestingly, this mechanism recapitulates dyslipidemia in humans, when the compromised adipose tissue abnormally releases lipoproteins of the APO family, among others, to induce the accumulation of fats in other organs (Pirillo et al., 2021). While dyslipidemia is most commonly associated with heart and cardiovascular diseases (Rahman et al., 2017), it plays a role also in other organ diseases and pathologies such as diabetic kidney diseases (DKD), non-alcoholic fatty liver disease (NAFLD) and in obesity (Fornoni et al., 2014; Mitrofanova et al., 2021).

#### Wing imaginal discs

NOC1 function is necessary to control protein synthesis and growth. Indeed, we show in the wing discs with that clones with reduced *NOC1* are outcompeted by wild type cells and die by apoptosis (Fig. 5K-M). These defects were partially rescued by reducing protein synthesis in a hypomorphic mutant background with the *Minute(3)66D/+* gene (Fig. 5N-O). This suggests that the *NOC1-RNAi* cells suffer of reduced protein synthesis, also confirmed by SUnSET assay (Fig. 1J). Our data are supporting recent reports that associate mutations in ribosomal proteins to proteotoxic stress and cell competition (Baumgartner et al., 2021; Recasens-Alvarez et al., 2021). Here we propose a novel role for NOC1 in the nucleolus that may act upstream or together with ribosomal proteins to control protein synthesis and cell competition.

The regulation of the final size of an organ is controlled by pathways that integrate systemic and organ-specific signals. Larval development is also controlled by the growth of the imaginal discs, that increase their size by actively proliferating until the animal reaches the larva-pupal transition. Any perturbation of this equilibrium, for



example by damaging cells of the imaginal discs, results in the activation of an inter-organ growth inhibiting mechanism, driven by the secreted factor DILP8. This event coordinates the growth and maturation of the other discs and retards pupariation allowing for the regeneration of the damaged tissues (Colombani et al., 2015; Garelli et al., 2015; Vallejo et al., 2015).

The reduction of NOC1 in a larger compartment of the wing disc, marginally reduces the size of the disc, analyzed at 120 hours AEL (Fig. 6A-C). This was in accord with the reduced size of the larvae measured at the same time of development (Fig. 6G). In addition, these animals show a substantial developmental delay (Fig. 6I), accompanied by an upregulation of DILP8 (Fig. 6L), normally induced by cellular damage. Indeed, we found that cells with reduced NOC1 upregulates *eiger* (Fig. 6N), a member of the TNF $\alpha$  family and the JNK pathway (Fig. 6P), suggesting that apoptosis in these cells is driven by the *eiger*-JNK, signaling pathway (Igaki and Miura, 2014). However, many studies are currently undergoing to better define which mechanisms govern cellular damage and we believe that *eiger* is not the only pathway involved. Indeed, other components have been recently identify that link defects in protein synthesis to apoptosis in cell competition, including the ribosomal protein RpS3 (Baumgartner et al., 2021), RpS12 (Akai et al., 2021; Ji et al., 2019), p53 (Sanchez et al., 2019) and its target Xrp1 (Boulan et al., 2019). At the moment, it is not clear totally how these components interact to each other's in the control of apoptosis and if act non autonomously in the mechanism of cell competition, and how these pathways induce the release of DILP8 necessary for the coordination of animal growth in *Drosophila*. Cell competition is a physiological mechanism conserved in many species, we suspect that similar mechanism for inducing apoptosis may also be present in vertebrates for example in the control of cell competition in embryos or during tissue morphogenesis (Claveria et al., 2013; Ellis et al., 2019; Munoz-Martin et al., 2019).

## CEBPZ

Our bioinformatics analysis for the human homologue CEBPz outlines evidence for its role in controlling nucleolar activity, particularly in tumors. Indeed analysis of two

TCGA datasets from cBio Cancer Genomic Portal (Cerami et al., 2012; Gao et al., 2013) (TCGA: Liver Hepatocellular Carcinoma, GDAC: Firehose and Breast Cancer) (Curtis et al., 2012; Pereira et al., 2016) shows a correlation between altered *CEBPz-mRNA* expression in liver and breast tumors with the upregulation of nucleolar and ribosomal proteins (S4). The fact that some of these targets, such as Rpl5, Rpl35a, are mutated in patients affected by ribosomopathies (i.e. Diamond Blackfan Anemia -DBA), suggests a potential novel role for *CEBPz* in controlling nucleolar activity and the insurgence of tumors in patients suffering from these genetic diseases (Mills and Green, 2017; Narla and Ebert, 2010), a connection that, at the moment, is not completely clear.

In summary, our results highlight an important role for the nucleolar NOC1, NOC2 and NOC3 in the control of animal growth and physiology in *Drosophila*. The reduction of each of the *NOCs* genes result in similar phenotypes due to the loss of nucleolar integrity and highlight their unique function. In particular we show that NOC1 controls ribosome biogenesis and its reduction causes apoptosis probably as the result of reduced protein synthesis. NOC1 activity is relevant for cell growth and its reduction results in cell competition, a physiological process identified in *Drosophila* and conserved in vertebrates, where it is involved in regulating the fitness of cells (Claveria and Torres, 2016), but when dis-regulated promotes the insurgence of cancer (Vishwakarma and Piddini, 2020).

## **Materials and Methods**

### ***Drosophila* husbandry and lines**

Animals were raised at low density in small vials containing standard fly food, composed of 9g/L agar, 75 g/L corn flour, 50 g/L fresh yeast, 30g/L yeast extract, 50 g/L white sugar and 30 mL/L molasses, along with nipagine (in ethanol) and propionic acid. The crosses and flies used for the experiments are kept at 25°C, unless otherwise stated.

The following fly lines were used: *GMR-Gal4* (Parisi et al., 2011), *tub>y+>Gal4*; *ey-flp* (Bellosta et al., 2005), *P0206-GFP-Gal4* (Valenza et al., 2018), the fat body specific promoter *FB-Gal4* (kind gift from Ines Anderl, University of Tampere,

Finland.) *rotund-Gal4* (kind gift from Hugo Stocker, ETH Zurich, CH), *actin-Gal4,UAS-GFP/Gla,Bla* (kind gift from Daniela Grifoni University of l' Aquila, IT), *yw; Actin>CD2>Gal4,GFP/TM6b* (kind gift from Bruce Edgar, University of Boulder, CO), *MS1096-Gal4* (kind gift from Erika Bach, NYU, USA), *Minute(3)66D/+* (Saeboe-Larsen et al., 1997), *engrailed-Gal4,GFP* and *actin-Gal4, GFP; tub-Gal80ts* from the lab. The following stocks were obtained from the Bloomington *Drosophila* Stock Center: *Cg-Gal4.A2* (B7011), *elav-Gal4* (B458), *UAS-CG7839-RNAi* (B25992), *UAS-CG9246-RNAi* (B50907), *UAS-CG1234-RNAi* (B618720), *dilp8-GFP/MI00727* (B33079); and from the Vienna *Drosophila* Resource Center: *UAS-CG7839-RNAi* (v12691), and isogenic *w<sup>1118</sup>* (v60000) *eiger-GFP-2XTY1-SGFP-V5-preTEV-BLRP-3XFLAG* (v318615); and the line *UAS-CG7839-3xHA* was obtained from FlyORF (ZH) (F001775).

### Measurement of larval length and volume

Larvae at the indicated stage of development and genotypes were anesthetized using freezing cold temperature, and pictures were taken using a Leica MZ16F stereomicroscope. Width and length were measured using a grid and volume was calculated by applying the formula in (Parisi et al., 2013).

### Quantitative rRT-PCR

RNA extraction was performed using the RNeasy Mini Kit (Qiagen), following the manufacturer instructions. The isolated RNA was quantified with the Nanodrop2000. 1000 ng of total RNA were retrotranscribed into complementary DNA (cDNA) using the SuperScript IV VILO Master Mix (Invitrogen). The obtained cDNA was used for qRT-PCR using the SYBR Green PCR Kit (Qiagen). The assays were performed on a BioRad CFX96 machine and the analysis were done using Bio-Rad CFX Manager software. Transcript abundance was normalized using *actin5c*. The list of the primers is available upon request. List of the primers used in Fig. S6.

### Dissection and immunofluorescence

Larvae were collected at the third instar stage, dissected in 1x phosphate-buffered saline (PBS), and fixed for 30 minutes in 4% paraformaldehyde (PFA) at room temperature (RT). After 15 minutes of tissue permeabilization with 0.3% Triton X-100, samples were washed in PBS-0.04% Tween20 (PBST) and blocked in 1% bovine serum albumin (BSA) for 1 hour at RT. Samples were incubated overnight at 4°C with primary antibodies in 1% BSA and, after washing, with Alexa-Fluor-conjugated secondary antibodies 1:2000 in BSA. During washing in PBST nuclei were stained with Hoechst. Imaginal discs were dissected from the carcasses and mounted on slides with Vectashield. Images were acquired using a Leica SP8 confocal microscope and assembled using Photoshop2020 from Creative Clouds. Secondary antibodies used: Moab rat anti-HA antibodies 1:1000 (Roche 3f10) and Moab anti-fibrillarin (ABCAM ab4566), anti WG 1:100 (DSHB 4D4).

### **Western blot**

Proteins were extracted from third instar larvae collected in 250 ul of lysis buffer (50 mM Hepes pH 7.4, 250 mM NaCl, 1 mM EDTA, 1.5% Triton X-100) containing a cocktail of phosphatases and proteases inhibitors (Roche). Samples were run on a SDS-polyacrylamide gel and then transferred to a nitrocellulose membrane. After blocking with 5% non-fat milk in TBS-Tween, membranes were incubated with primary antibodies against puromycin (1:000, clone 12D10 MABE343, Merk)), supernatant mouse anti HA, and actin (1:200, Developmental Studies Hybridoma Bank, 224-236-1), followed by incubation with secondary anti-mouse or rabbit (1:2000 Santa Cruz Biotechnology), and signal was detected using ECL LiteAbiot Plus (Euroclone) and the UVITec Alliance LD2.

### **WB SUnSET assay**

*UAS-NOC1-RNAi* was expressed ubiquitously in whole larvae using the *actin-Gal4* coupled with *tubulin-Gal80* temp sensitive allele to avoid early lethality. Crosses were kept at 18°C and when larvae reached second instar and were switched to 30°C for 72 hours prior to dissection. At least seven third-instar larvae for each genotype were dissected in Schneider's medium and then transferred to Eppendorf tubes containing complete medium with 10 % serum plus puromycin at 20 µg/ml

(Invitrogen, Thermo Fisher Scientific). The samples were incubated for 40 or 60 minutes at room temperature, then recovered in 10% serum/media without puromycin for 30 minutes at room temperature. After the inverted larvae were snap frozen in liquid nitrogen for subsequent western blot analysis using anti-puromycin primary antibody.

### **Polysome profiling**

Cytoplasmic lysates were obtained from snap-frozen whole larvae were pulverized using liquid nitrogen. After addition of lysis buffer and centrifugations for removal of the debris, cleared supernatants were loaded on a linear 10%–40% sucrose gradient and ultracentrifuged in a SW41Ti rotor (Beckman) for 1 hr and 30 min at 270,000  $g$  at 4°C in a Beckman Optima LE-80K Ultracentrifuge. After ultracentrifugation, gradients were fractionated in 1 mL volume fractions with continuous monitoring of absorbance at 254 nm using an ISCO UA-6 UV detector.

### **Generation of inducible flip-out clones and clonal analysis.**

Females, *yw; Actin>CD2>Gal4-nGFP/TM6b* were crossed with males carrying the heat-shock *Flippase y<sup>122</sup>w* together with the relative UAS-transgenes. Animals were left laying eggs for 3-4 hours. Heat shock was performed on larvae at 48 or 72 hours after egg laying (AEL) for 15 min at 37°C. Larvae were dissected at 96 or at 120 hrs AEL and mounted using MOWIOL. Images of clones expressing nGFP were acquired using a LEICA SP8 confocal microscope. Quantification of the number of GFP cell clones in the wing imaginal discs was calculated from 5 confocal images for every genotype at 40x magnification maintaining constant acquisition parameters. Co-staining with phalloidin-Rhodamine (Invitrogen) and DAPI was necessary in Fig 6 A-E to outline the cell membranes and the nuclei.

### **Imaging the adult compound eye and wings**

Photographs of eyes of adult female expressing the indicated UAS-transgenes in the retina using the *GMR-Gal4* or *tub>y+>Gal4* promoters were taken at 8 days after eclosion using a Leica stereomicroscope MZ16F at 4x magnification.

4-day old animals were fixed in a solution of 1:1 glycerol and ethanol. One wing was dissected from at least 10 animals and mounted on a slide in the same fixing solution. Images of each wing were taken using a Zeiss Axio Imager M2 microscope with a 1x magnification. Quantification of the area of each wing was performed on photographs using PhotoshopCS4.

### **Fat body staining and cell size calculation**

Fat bodies were dissected from larvae at 5 or 12 days AEL fixed in 4% PFA and counterstaining with Nile Red (Sigma), Phalloidin-488 (Invitrogen) and Hoechst 33258 (Sigma). After washing with PBS, fat bodies were mounted onto slides with DABCO-Mowiol (Sigma-Aldrich) and images were acquired using LeicaSP5-LEICA, the area of adipose cells for each fat body was calculated with ImageJ software. In order to visualize lipids in the whole larvae, animals were dissected and fixed as above, and stained with Nile-Red after extensive washing in PBS. Dissected organs were mounted in DABCO-Mowiol and photographs were taken using a Zeiss Axio M2 Imager light microscope.

### **CRISPER-Cas9 mutation of *Noc1/CG7839* in the posterior compartment of wing imaginal disc**

We target mutations on *CG7938* in the posterior compartment of the wing disc by crossing the line *v340019 P{ry[+7.2]=hsFLP}12, y[1] w[\*]; P{y[+7.7] w[+mC]=UAS-uMCas9}attP40; P{Gal4}hh-Gal4/TM6B*. This line carries the *Hedgehog (Hh)* *Gal4* and the *UAS-uMCas9* transgenes to spatially limit the transcription of Cas9 in the posterior region of the animal (Port et al., 2020). This line was crossed with that carrying the *gRNA* for *CG7839 (vCFDlib01132)* that was previously recombined with *UAS-GFP* to mark and visualize the cells in the posterior compartment. A line expressing only *UAS-GFP* was used as control. F1 animals from crosses were dissected at about 90 hours AEL and GFP and imagines of their wing imaginal discs were acquired using a confocal microscope (Leica-SP8). Calculation of the posterior (GFP) and total area of the wing imaginal discs was performed using Adobe

Photoshop (Creative Cloud). At least 8 animals from each genotype were used for the statistical analysis.

### **Statistical Analysis**

Student *t*-test analysis and analysis of the variance calculated using One-way ANOVA with Tukey multi-comparisons test were calculated using GraphPad-PRISM8. *p* values are indicated with asterisks \* =  $p < 0.05$ , \*\* =  $p < 0.01$ , \*\*\* =  $p < 0.001$ , \*\*\*\* =  $p < 0.0001$ , respectively.

### **Acknowledgements**

We thank the Confocal Facility at IFOM and at CIBIO, the Vienna VDRC and Bloomington Stocks Centers and the DSHB for antibodies. Stocks obtained from the Bloomington Drosophila Stock Center (NIH P40OD018537) were used in this study. We apology in advance to any authors whose work has been omitted.

### **Competing interest**

No competing interest declared

### **Funding**

This work was supported by the NIH Public Health Service grant from the NIH-SC1DK085047 to PB and SZ, MAE PGR00155 to EMP.

**Data availability** none

### **Legends**

**Figure 1: NOCs are important for animal growth and survival; particularly NOC1 controls protein synthesis and polysome abundance.** (A) Schematic representation of NOC1, NOC2 and NOC3 proteins and their human homologues. NOC1 contains a CBP domain (CCAAT binding domain), in orange, that shares 32% sequence identity. Brown represents the conserved NOC domain of 45 amino acids found in NOC1 and NOC3, that share 48% and 38% identity between the Dm and human proteins respectively. NOC2 shares an overall 36% of identity between Dm



and human NOC2p. Black is representing the region of highest homology (48%). (B) predicted list of the functional partners of NOC1/CG7839 and their graphic representation (C) using the protein-protein interaction networks generated using STRING (Szklarczyk et al., 2019). (D) Photos of larvae at third instar expressing the indicated transgenes under the *actin* driver, taken at 120 hours after egg laying (AEL). In the inset are pictures of *NOC1-RNAi* larvae (middle) rescued by the overexpression of *NOC1* (right); these rescued larvae are significantly smaller than control *w<sup>1118</sup>* larvae (left) (Supplementary Fig. 2) but are able to undergo metamorphosis and to develop into adult flies (not shown); the scale bar represents 1 mm. (E) Length (in mm.) of larvae of the relative genotype. (F) qRT-PCR showing the amount of *NOC-mRNA* from instar larvae at 120 hours AEL; *actin5C* was used as control. (G-I) Representative sucrose density gradient profiles of ribosome from control larvae (G) or animal over-expressing *NOC1* (H) or *NOC1-RNAi* (I). (J) WB SUnSET western blot analysis in lysates from dissected larvae treated with puromycin for the indicated time. The blot shows the relative changes in protein synthesis using anti puromycin antibodies in control *w<sup>1118</sup>* or larvae ubiquitously expressing *NOC1-RNAi* using the *actin*-promoter. Actin was used as control loading. (K) Graph representing the quantification of the relative change in the rate of puromycin incorporation, normalized to actin is shown. (L) Confocal photo (63x) of cells overexpressing *HA-NOC1* and nuclear GFP to marks the nuclear membrane in cells of the wing disc using the *engrailed* promoter. Anti HA-staining (red) shows the localization of HA-NOC1 in granules in the nucleus and a partial overlap with anti-fibrillarin staining the nucleolus (blue). (H) Western blot from lysates of larvae expressing *HA-NOC1* using the *actin* driver, showing a band of 132 KDa, as expected from NOC1 amino acid sequence, and a few bands running at a lower molecular weight recognized by the HA antibody. Data in (E-F) are representative of three experiments, the asterisks represent the *p*-values from One-way analysis of variance (ANOVA) with Tukey multiple comparison \* = *p* < 0.05, \*\* = *p* < 0.01, \*\*\* = *p* < 0.001 and \*\*\*\* = *p* < 0.0001, and the error bars indicate the standard deviations.

**Figure 2: NOC1, NOC2 and NOC3 are necessary for the formation of the ommatidia in the compound eye.** Photographs of *Drosophila*-compound eyes (lateral view) from males 4 days after eclosion expressing the indicated transgenes in differentiated cells of the eye (A-E) using the *GMR-Gal4*, or in the proliferative

cells of the *eyeless* compartment using the *tubulin>CD2>Gal4; eyeless-flp* line that constrains *Gal4* under *eyeless* expression (F-J). Similar data were obtained using females (not shown).

**Figure 3: NOC1-RNAi in the prothoracic gland reduces cell size and ecdysone and extends development.** (A-C) Confocal images of the ring gland marked with GFP using the *P0206-GFP* driver line in control larvae *w<sup>1118</sup>* (A) and in animals with reduced *NOC1* at 5 days (B) and at 12 days AEL. (C). (D) q-RT-PCR showing the level of *E74A-mRNA*, target of ecdysone; (E) analysis of cell size in the fat body from control *w<sup>1118</sup>* larvae (black) or *NOC1-RNAi* (blue) larvae at 5 days and at 12 days AEL (light-blue). (F) Photographs of animals with reduced NOCs expression in the prothoracic gland using the *P0206-GFP* promoter. Picture represents *w<sup>1118</sup>* larvae at 5 days AEL and *NOC1-3-RNAi* at 12 days AEL. The asterisks in D and E represent the *p*-values from *t*-test Student analysis \* = *p* < 0.05 and \*\*\*\* = *p* < 0.0001, the error bars indicate the standard deviations.

**Figure 4: NOC1 downregulation in the fat body reduces cell size and induces dyslipidemia.** (A-E) Confocal images of *actin*-flip-out clones expressing GFP together with the indicated transgenes visualized in the fat body. Phalloidin was used to mark cell membranes. (F) Quantification of the area of the clones. (G) Analysis of the larval volume, measured at the indicated time of development until pupariation, in animals in which *NOC1* was reduced using the *Cg* promoter. (H) Analysis of the wing size of 4 days old females of the indicated genotypes. Similar data were obtained using males (not shown). (I-P) Photographs of larval organs stained with Nile red to visualize lipids. Reduction of *NOC1-RNAi* (I-L) reduces the deposition of fats as compared to control (M-P). The inability of the fat body to accumulate fats in *NOC1-RNAi* animals activates storage of fats in other organs, visible in the wing imaginal discs (wid) (M), in the gut (O) and in the brain (N), sg= salivary glands. (Q-R) Confocal images of third instar larval brains showing DILP2 immunostaining in the Insulin Producing Cells (IPCs) cells from control (Q) and *NOC1-RNAi* (R) animals in feeding conditions. Data in (F, G and H) are representative of one of three experiments using ten or more animals for each genotype; the asterisks represent the *p*-values from One-way analysis of variance

(ANOVA) with Tukey multiple comparison \* =  $p < 0.05$ , \*\* =  $p < 0.01$ , \*\*\* =  $p < 0.001$  and \*\*\*\* =  $p < 0.0001$ , and the error bars indicate the standard deviations.

**Figure 5: NOC1 is necessary for the growth and survival of cells in the wing imaginal discs. The defects in NOC1-RNAi cells are rescued by co-expression of p35 and in a Minute(3)66D/+ heterozygous background.** (A-E) Confocal images of *actin*-flip-out clones marked by nuclear GFP co-expressing the indicated transgenes and visualized in the wing imaginal discs. Phalloidin was used to mark the cell membranes (red) and DAPI for the nuclei (blue). (J) Quantification of the clonal size was performed by measuring their area and shown in pixels. At least 15 animals from each genotype were used. (F) Photographs of wing imaginal discs showing *actin*-flip-out clones expressing GFP alone (G) or co-expressing *NOC1-RNAi*. Clones were induced at 48 hours AEL. (H) Quantification of the number of cells in each clone analyzed at 120 hours AEL. (K-M) Photographs of *actin*-flip-out clones in wing discs expressing GFP with the inhibitor of caspase p35 (K), with *NOC1-RNAi* (L) or expressing *NOC1-RNAi* together with p35 (M). Clones were induced at 72 hrs AEL and the cell number in each clone was quantified at 120 hours AEL. (I) The total number of clones analyzed is indicated in parenthesis:  $w^{1118}$  + p35 (72, [1.0]), *NOC1-RNAi* alone (66, [0.15]), *NOC1-RNAi* + p35 (81, [0.60]). The number in square brackets represents the relative size of the clones compared to that from control, considered equal to 1. (N-O) Analysis of cell number and size of *NOC1-RNAi* clones induced in wild-type and in a *Minute(3)66D/+* background. (N) Quantification of the number of clones in each disc. (O) Analysis of clonal size. These results show that the growth defect of *NOC1-RNAi* cells is partially rescued when clones are grown with a reduced growth rate using the *Minute(3)66D/+* background. The asterisks in H, I, J, N and O represent the  $p$ -values from One-way analysis of variance (ANOVA) with Tukey multiple comparison \* =  $p < 0.05$ , \*\* =  $p < 0.01$ , \*\*\* =  $p < 0.001$  and \*\*\*\* =  $p < 0.0001$ , and the error bars indicate the standard deviations. Hoechst is used for staining the nuclei.

**Figure 6: Reduction of NOC1 activates the eiger-Dilp8 axis inducing developmental delay.** Confocal images of wing imaginal discs (A-C), or photos of adult wings (D-F) expressing the indicated transgenes using the *MS1096* wing-driver. (G) Larval volume of animals expressing the indicated transgenes using the

*MS1096*-driver, measured at the indicated time after egg laying (AEL) until pupariation. (H) Quantification of the size of the wings from adult animals of the indicated genotypes at 4 days after eclosion. Data are expressed as % from control *w<sup>1118</sup>*. (I) Curves representing the % of pupariation in animals of the indicated genotypes. A delay in pupariation is visible in animals where *NOC1-RNAi* was reduced in the wing pouch. Data are expressed as % of pupariation over the total number of pupae of the same genotype for each genotype over time, SD is the average of three independent experiments. (J) q-RT-PCR showing the level of *Dilp8-mRNA* in wing imaginal discs overexpressing *NOC1* or *NOC1-RNAi* using the *MS1096* promoter, *Actin5C mRNA* was used as control. (K-P) Confocal images of wing imaginal discs of third instar from *w<sup>1118</sup>* and *NOC1-RNAi* larvae expressing *dilp8-GFP* (K-L) or *eiger-GFP* (M-N) proteins, using the *rotund*-driver or expressing the *TRE-GstD1-RFP* as reporter for JNK activation using the *MS1096* promoter (O-P). (G, H I and J) are representative of one of three experiments using ten or more animals for each genotype, the asterisks represent the *p*-values from One-way analysis of variance (ANOVA) with Tukey multiple comparison \* = *p* < 0.05, \*\* = *p* < 0.01, \*\*\* = *p* < 0.001 and \*\*\*\* = *p* < 0.0001, and the error bars indicate the standard deviations. MODEL: The function of nucleolar *NOC1* is important for the control of growth and cell survival. Indeed, reduction of *NOC1* decreases protein synthesis (showed by SUnSET and with the rescue of defective growth in a *Minute/+* background), and causes a cellular stress resulting in apoptosis and the upregulation of the pro-apoptotic *eiger* and JNK pathway. Cells of the wing discs respond with the activation of the DILP8-compensatory mechanism that by reducing ecdysone delays animal development.

**Figure 7: Targeted *NOC1* CRISPR-mutation in the posterior compartment of the wing imaginal discs, phenocopies the effect of *NOC1* downregulation using RNAi interference.** (A-D) Confocal images of wing imaginal discs from animals at 120 hours AEL expressing (A-B) *hedgehog-Gal4-GFP* (*hh-Gal4*) together with GFP and the *uMcas9* construct alone (A), or together with the *sg-RNA<sup>CG7839</sup>* (B) to conditionally knockout *NOC1* in cells of the posterior compartment of the wing disc, marked with GFP expression. (C-D) *engrailed* (*en*)-*Gal4* expressing GFP in the posterior compartment alone (C), or co-expressing *NOC1-RNAi* (D). (E-H) Quantification of the total area (E-G) of the wing imaginal discs and of the ratio

posterior/anterior (F-H) of the compartments from control *hh-Gal4-GFP* (A) and from *hh-Gal4-sg-NOC1-GFP* larvae (B); or from control *en-Gal4-GFP* (C) or co-expressing *NOC1-RNAi* <sup>II</sup> (D). Data in (E-H) are representative of one of three experiments using ten or more animal for each genotype, the asterisks represent the *p*-values from *t*-test Students \* = *p* < 0.05, \*\* = *p* < 0.01, \*\*\* = *p* < 0.001 and \*\*\*\* = *p* < 0.0001, and the error bars indicate the standard deviations.

## References

- Akai, N., Ohsawa, S., Sando, Y. and Igaki, T.** (2021). Epithelial cell-turnover ensures robust coordination of tissue growth in *Drosophila* ribosomal protein mutants. *PLoS Genet* **17**, e1009300.
- Andersen, D. S., Colombani, J. and Leopold, P.** (2013). Coordination of organ growth: principles and outstanding questions from the world of insects. *Trends Cell Biol* **23**, 336-344.
- Baral, S. S., Lieux, M. E. and DiMario, P. J.** (2020). Nucleolar stress in *Drosophila* neuroblasts, a model for human ribosomopathies. *Biology open* **9**.
- Barna, M., Pusic, A., Zollo, O., Costa, M., Kondrashov, N., Rego, E., Rao, P. H. and Ruggero, D.** (2008). Suppression of Myc oncogenic activity by ribosomal protein haploinsufficiency. *Nature* **456**, 971-975.
- Baumgartner, M. E., Dinan, M. P., Langton, P. F., Kucinski, I. and Piddini, E.** (2021). Proteotoxic stress is a driver of the loser status and cell competition. *Nat Cell Biol* **23**, 136-146.
- Bellosta, P., Hulf, T., Balla Diop, S., Usseglio, F., Pradel, J., Aragnol, D. and Gallant, P.** (2005). Myc interacts genetically with Tip48/Reptin and Tip49/Pontin to control growth and proliferation during *Drosophila* development. *Proc Natl Acad Sci U S A* **102**, 11799-11804.
- Boulan, L., Andersen, D., Colombani, J., Boone, E. and Leopold, P.** (2019). Inter-Organ Growth Coordination Is Mediated by the Xrp1-Dilp8 Axis in *Drosophila*. *Dev Cell* **49**, 811-818 e814.
- Boulan, L. and Leopold, P.** (2021). What determines organ size during development and regeneration? *Development* **148**.
- Capdevila, J. and Guerrero, I.** (1994). Targeted expression of the signaling molecule decapentaplegic induces pattern duplications and growth alterations in *Drosophila* wings. *EMBO J* **13**, 4459-4468.
- Cerami, E., Gao, J., Dogrusoz, U., Gross, B. E., Sumer, S. O., Aksoy, B. A., Jacobsen, A., Byrne, C. J., Heuer, M. L., Larsson, E., et al.** (2012). The cBio cancer genomics portal: an open platform for exploring multidimensional cancer genomics data. *Cancer Discov* **2**, 401-404.
- Claveria, C., Giovinazzo, G., Sierra, R. and Torres, M.** (2013). Myc-driven endogenous cell competition in the early mammalian embryo. *Nature* **500**, 39-44.
- Claveria, C. and Torres, M.** (2016). Cell Competition: Mechanisms and Physiological Roles. *Annu Rev Cell Dev Biol* **32**, 411-439.
- Colombani, J., Andersen, D. S., Boulan, L., Boone, E., Romero, N., Virolle, V., Texada, M. and Leopold, P.** (2015). *Drosophila* Lgr3 Couples Organ Growth



- with Maturation and Ensures Developmental Stability. *Curr Biol* **25**, 2723-2729.
- Correll, C. C., Bartek, J. and Dundr, M.** (2019). The Nucleolus: A Multiphase Condensate Balancing Ribosome Synthesis and Translational Capacity in Health, Aging and Ribosomopathies. *Cells* **8**.
- Cui, Z. and DiMario, P. J.** (2007). RNAi knockdown of Nopp140 induces Minute-like phenotypes in *Drosophila*. *Mol Biol Cell* **18**, 2179-2191.
- Curtis, C., Shah, S. P., Chin, S. F., Turashvili, G., Rueda, O. M., Dunning, M. J., Speed, D., Lynch, A. G., Samarajiwa, S., Yuan, Y., et al.** (2012). The genomic and transcriptomic architecture of 2,000 breast tumours reveals novel subgroups. *Nature* **486**, 346-352.
- Deliu, L. P., Ghosh, A. and Grewal, S. S.** (2017). Investigation of protein synthesis in *Drosophila* larvae using puromycin labelling. *Biology open* **6**, 1229-1234.
- Destefanis, F., Manara, V. and Bellosta, P.** (2020). Myc as a Regulator of Ribosome Biogenesis and Cell Competition: A Link to Cancer. *International journal of molecular sciences* **21**.
- Dlagic, M. and Tollervey, D.** (2004). The Noc proteins involved in ribosome synthesis and export contain divergent HEAT repeats. *RNA* **10**, 351-354.
- Edskes, H. K., Ohtake, Y. and Wickner, R. B.** (1998). Mak21p of *Saccharomyces cerevisiae*, a homolog of human CAATT-binding protein, is essential for 60 S ribosomal subunit biogenesis. *J Biol Chem* **273**, 28912-28920.
- Ellis, S. J., Gomez, N. C., Leverage, J., Mertz, A. F., Ge, Y. and Fuchs, E.** (2019). Distinct modes of cell competition shape mammalian tissue morphogenesis. *Nature* **569**, 497-502.
- Fornoni, A., Merscher, S. and Kopp, J. B.** (2014). Lipid biology of the podocyte--new perspectives offer new opportunities. *Nat Rev Nephrol* **10**, 379-388.
- Gao, J., Aksoy, B. A., Dogrusoz, U., Dresdner, G., Gross, B., Sumer, S. O., Sun, Y., Jacobsen, A., Sinha, R., Larsson, E., et al.** (2013). Integrative analysis of complex cancer genomics and clinical profiles using the cBioPortal. *Sci Signal* **6**, pl1.
- Garelli, A., Heredia, F., Casimiro, A. P., Macedo, A., Nunes, C., Garcez, M., Dias, A. R., Volonte, Y. A., Uhlmann, T., Caparros, E., et al.** (2015). Dilp8 requires the neuronal relaxin receptor Lgr3 to couple growth to developmental timing. *Nat Commun* **6**, 8732.
- Geminard, C., Rulifson, E. J. and Leopold, P.** (2009). Remote control of insulin secretion by fat cells in *Drosophila*. *Cell Metab* **10**, 199-207.
- Grewal, S. S., Li, L., Orian, A., Eisenman, R. N. and Edgar, B. A.** (2005). Myc-dependent regulation of ribosomal RNA synthesis during *Drosophila* development. *Nat Cell Biol* **7**, 295-302.
- Hay, B. A., Wolff, T. and Rubin, G. M.** (1994). Expression of baculovirus P35 prevents cell death in *Drosophila*. *Development* **120**, 2121-2129.
- Hierlmeier, T., Merl, J., Sauert, M., Perez-Fernandez, J., Schultz, P., Bruckmann, A., Hamperl, S., Ohmayer, U., Rachel, R., Jacob, A., et al.** (2013). Rrp5p, Noc1p and Noc2p form a protein module which is part of early large ribosomal subunit precursors in *S. cerevisiae*. *Nucleic Acids Res* **41**, 1191-1210.
- Hironaka, K. I., Fujimoto, K. and Nishimura, T.** (2019). Optimal Scaling of Critical Size for Metamorphosis in the Genus *Drosophila*. *iScience* **20**, 348-358.
- Horng, T. and Hotamisligil, G. S.** (2011). Linking the inflammasome to obesity-related disease. *Nat Med* **17**, 164-165.

- Hyun, S.** (2018). Body size regulation by maturation steroid hormones: a *Drosophila* perspective. *Front Zool* **15**, 44.
- Igaki, T. and Miura, M.** (2014). The *Drosophila* TNF ortholog Eiger: emerging physiological roles and evolution of the TNF system. *Seminars in immunology* **26**, 267-274.
- Ji, Z., Kiparaki, M., Folgado, V., Kumar, A., Blanco, J., Rimesso, G., Chuen, J., Liu, Y., Zheng, D. and Baker, N. E.** (2019). *Drosophila* RpS12 controls translation, growth, and cell competition through Xrp1. *PLoS Genet* **15**, e1008513.
- Johnston, L. A., Prober, D. A., Edgar, B. A., Eisenman, R. N. and Gallant, P.** (1999). *Drosophila* myc regulates cellular growth during development. *Cell* **98**, 779-790.
- Koyama, T., Texada, M. J., Halberg, K. A. and Rewitz, K.** (2020). Metabolism and growth adaptation to environmental conditions in *Drosophila*. *Cell Mol Life Sci* **77**, 4523-4551.
- Lee, C. H., Kiparaki, M., Blanco, J., Folgado, V., Ji, Z., Kumar, A., Rimesso, G. and Baker, N. E.** (2018). A Regulatory Response to Ribosomal Protein Mutations Controls Translation, Growth, and Cell Competition. *Dev Cell* **46**, 456-469 e454.
- Li, N., Yuan, L., Liu, N., Shi, D., Li, X., Tang, Z., Liu, J., Sundaresan, V. and Yang, W. C.** (2009). SLOW WALKER2, a NOC1/MAK21 homologue, is essential for coordinated cell cycle progression during female gametophyte development in Arabidopsis. *Plant physiology* **151**, 1486-1497.
- Lum, L. S., Sultzman, L. A., Kaufman, R. J., Linzer, D. I. and Wu, B. J.** (1990). A cloned human CCAAT-box-binding factor stimulates transcription from the human hsp70 promoter. *Mol Cell Biol* **10**, 6709-6717.
- Maniere, G., Alves, G., Berthelot-Grosjean, M. and Grosjean, Y.** (2020). Growth regulation by amino acid transporters in *Drosophila* larvae. *Cell Mol Life Sci* **77**, 4289-4297.
- Marygold, S. J., Roote, J., Reuter, G., Lambertsson, A., Ashburner, M., Millburn, G. H., Harrison, P. M., Yu, Z., Kenmochi, N., Kaufman, T. C., et al.** (2007). The ribosomal protein genes and Minute loci of *Drosophila melanogaster*. *Genome Biol* **8**, R216.
- Milkereit, P., Gadai, O., Podtelejnikov, A., Trumtel, S., Gas, N., Petfalski, E., Tollervey, D., Mann, M., Hurt, E. and Tschochner, H.** (2001). Maturation and intranuclear transport of pre-ribosomes requires Noc proteins. *Cell* **105**, 499-509.
- Mills, E. W. and Green, R.** (2017). Ribosomopathies: There's strength in numbers. *Science* **358**.
- Mitrofanova, A., Burke, G., Merscher, S. and Fornoni, A.** (2021). New insights into renal lipid dysmetabolism in diabetic kidney disease. *World J Diabetes* **12**, 524-540.
- Munoz-Martin, N., Sierra, R., Schimmang, T., Villa Del Campo, C. and Torres, M.** (2019). Myc is dispensable for cardiomyocyte development but rescues Mycn-deficient hearts through functional replacement and cell competition. *Development* **146**.
- Nagata, R. and Igaki, T.** (2018). Cell competition: Emerging mechanisms to eliminate neighbors. *Development, growth & differentiation* **60**, 522-530.
- Narla, A. and Ebert, B. L.** (2010). Ribosomopathies: human disorders of ribosome dysfunction. *Blood* **115**, 3196-3205.



- Neumuller, R. A., Gross, T., Samsonova, A. A., Vinayagam, A., Buckner, M., Founk, K., Hu, Y., Sharifpoor, S., Rosebrock, A. P., Andrews, B., et al.** (2013). Conserved regulators of nucleolar size revealed by global phenotypic analyses. *Sci Signal* **6**, ra70.
- Nijhout, H. F., Riddiford, L. M., Mirth, C., Shingleton, A. W., Suzuki, Y. and Callier, V.** (2014). The developmental control of size in insects. *Wiley interdisciplinary reviews. Developmental biology* **3**, 113-134.
- Palm, W., Sampaio, J. L., Brankatschk, M., Carvalho, M., Mahmoud, A., Shevchenko, A. and Eaton, S.** (2012). Lipoproteins in *Drosophila melanogaster*--assembly, function, and influence on tissue lipid composition. *PLoS Genet* **8**, e1002828.
- Parisi, F., Riccardo, S., Daniel, M., Saqcena, M., Kundu, N., Pession, A., Grifoni, D., Stocker, H., Tabak, E. and Bellosta, P.** (2011). *Drosophila* insulin and target of rapamycin (TOR) pathways regulate GSK3 beta activity to control Myc stability and determine Myc expression in vivo. *BMC Biol* **9**, 65.
- Parisi, F., Riccardo, S., Zola, S., Lora, C., Grifoni, D., Brown, L. M. and Bellosta, P.** (2013). dMyc expression in the fat body affects DILP2 release and increases the expression of the fat desaturase Desat1 resulting in organismal growth. *Dev Biol* **379**, 64-75.
- Pereira, B., Chin, S. F., Rueda, O. M., Vollan, H. K., Provenzano, E., Bardwell, H. A., Pugh, M., Jones, L., Russell, R., Sammut, S. J., et al.** (2016). The somatic mutation profiles of 2,433 breast cancers refines their genomic and transcriptomic landscapes. *Nat Commun* **7**, 11479.
- Pirillo, A., Casula, M., Olmastroni, E., Norata, G. D. and Catapano, A. L.** (2021). Global epidemiology of dyslipidaemias. *Nat Rev Cardiol*.
- Port, F., Strein, C., Stricker, M., Rauscher, B., Heigwer, F., Zhou, J., Beyersdorffer, C., Frei, J., Hess, A., Kern, K., et al.** (2020). A large-scale resource for tissue-specific CRISPR mutagenesis in *Drosophila*. *eLife* **9**.
- Rahman, M. S., Murphy, A. J. and Woollard, K. J.** (2017). Effects of dyslipidaemia on monocyte production and function in cardiovascular disease. *Nat Rev Cardiol* **14**, 387-400.
- Recasens-Alvarez, C., Alexandre, C., Kirkpatrick, J., Nojima, H., Huels, D. J., Snijders, A. P. and Vincent, J. P.** (2021). Ribosomopathy-associated mutations cause proteotoxic stress that is alleviated by TOR inhibition. *Nat Cell Biol* **23**, 127-135.
- Rusten, T. E., Lindmo, K., Juhasz, G., Sass, M., Seglen, P. O., Brech, A. and Stenmark, H.** (2004). Programmed autophagy in the *Drosophila* fat body is induced by ecdysone through regulation of the PI3K pathway. *Dev Cell* **7**, 179-192.
- Saeboe-Larssen, S., Lyamouri, M., Merriam, J., Oksvold, M. P. and Lambertsson, A.** (1998). Ribosomal protein insufficiency and the minute syndrome in *Drosophila*: a dose-response relationship. *Genetics* **148**, 1215-1224.
- Saeboe-Larssen, S., Urbanczyk Mohebi, B. and Lambertsson, A.** (1997). The *Drosophila* ribosomal protein L14-encoding gene, identified by a novel Minute mutation in a dense cluster of previously undescribed genes in cytogenetic region 66D. *Mol Gen Genet* **255**, 141-151.
- Sanchez, J. A., Mesquita, D., Ingaramo, M. C., Ariel, F., Milan, M. and Dekanty, A.** (2019). Eiger/TNFalpha-mediated Dilp8 and ROS production coordinate intra-organ growth in *Drosophila*. *PLoS Genet* **15**, e1008133.

- Scott, R. C., Schuldiner, O. and Neufeld, T. P.** (2004). Role and regulation of starvation-induced autophagy in the *Drosophila* fat body. *Dev Cell* **7**, 167-178.
- Shokri, L., Inukai, S., Hafner, A., Weinand, K., Hens, K., Vedenko, A., Gisselbrecht, S. S., Dainese, R., Bischof, J., Furger, E., et al.** (2019). A Comprehensive *Drosophila melanogaster* Transcription Factor Interactome. *Cell Rep* **27**, 955-970 e957.
- Szklarczyk, D., Gable, A. L., Lyon, D., Junge, A., Wyder, S., Huerta-Cepas, J., Simonovic, M., Doncheva, N. T., Morris, J. H., Bork, P., et al.** (2019). STRING v11: protein-protein association networks with increased coverage, supporting functional discovery in genome-wide experimental datasets. *Nucleic Acids Res* **47**, D607-D613.
- Texada, M. J., Koyama, T. and Rewitz, K.** (2020). Regulation of Body Size and Growth Control. *Genetics* **216**, 269-313.
- Tortoriello, G., de Celis, J. F. and Furia, M.** (2010). Linking pseudouridine synthases to growth, development and cell competition. *The FEBS journal* **277**, 3249-3263.
- Valenza, A., Bonfanti, C., Pasini, M. E. and Bellosta, P.** (2018). Anthocyanins Function as Anti-Inflammatory Agents in a *Drosophila* Model for Adipose Tissue Macrophage Infiltration. *BioMed research international* **2018**, 6413172.
- Vallejo, D. M., Juarez-Carreño, S., Bolívar, J., Morante, J. and Domínguez, M.** (2015). A brain circuit that synchronizes growth and maturation revealed through Dilp8 binding to Lgr3. *Science* **350**, aac6767.
- van Riggelen, J., Yetil, A. and Felsher, D. W.** (2010). MYC as a regulator of ribosome biogenesis and protein synthesis. *Nat Rev Cancer* **10**, 301-309.
- Vishwakarma, M. and Piddini, E.** (2020). Outcompeting cancer. *Nat Rev Cancer* **20**, 187-198.

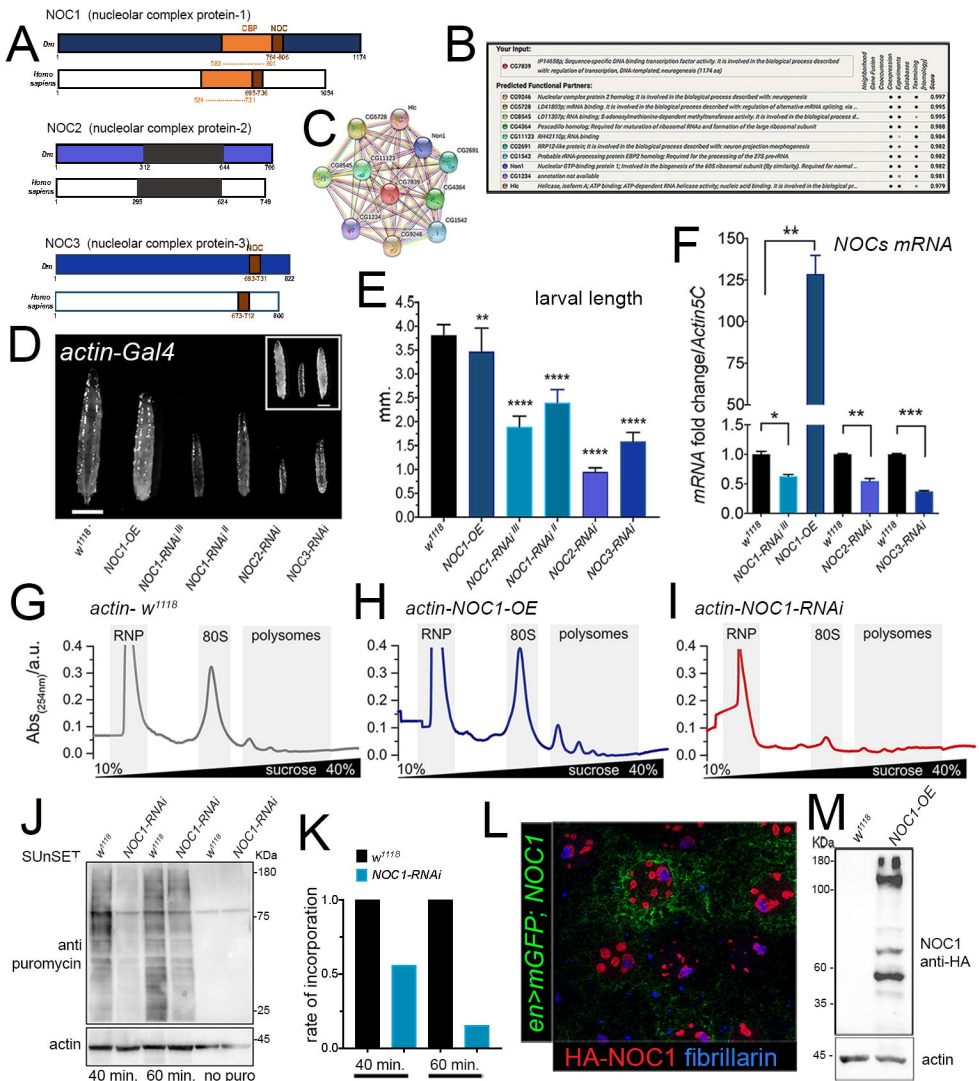

Figure 1

*GMR*

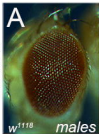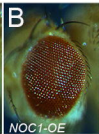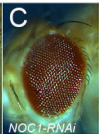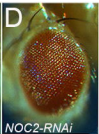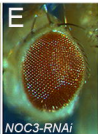

*tub-ey-flp*

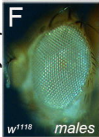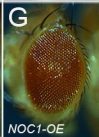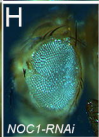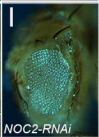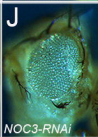

Figure 2

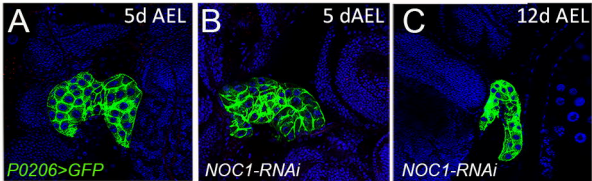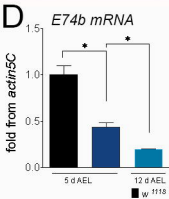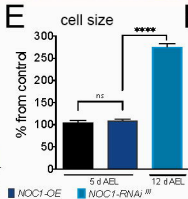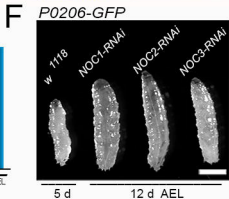

Figure 3

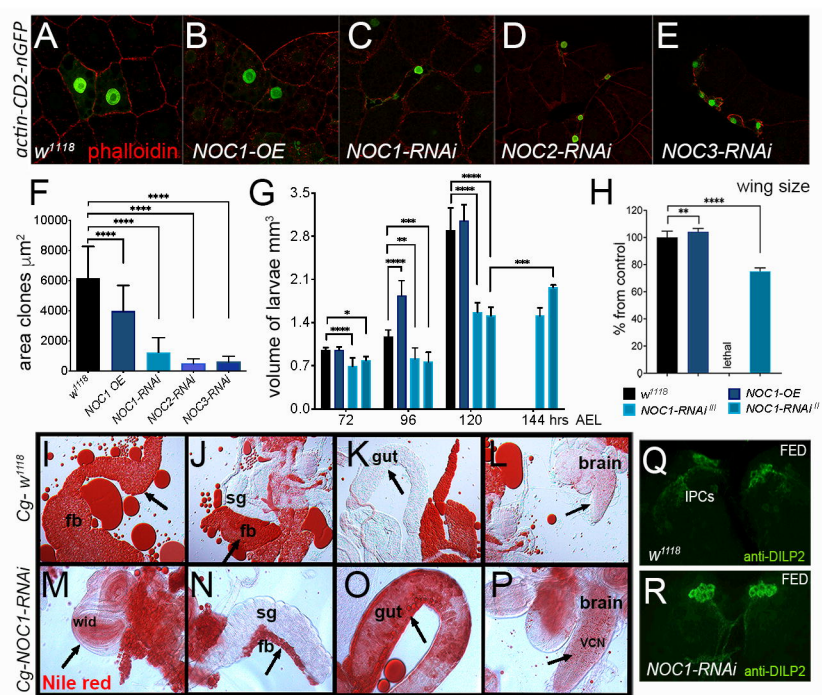

Figure 4





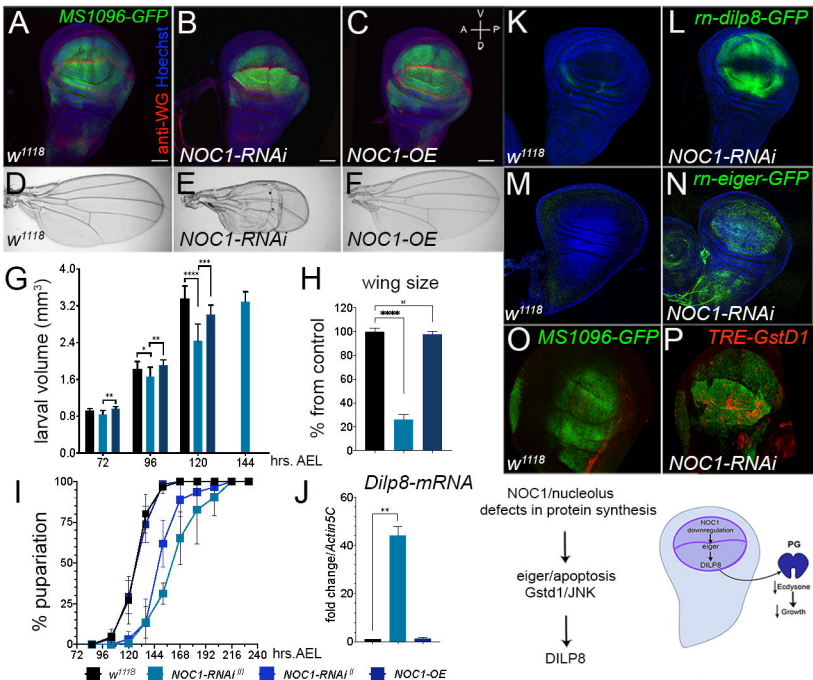

Figure 6

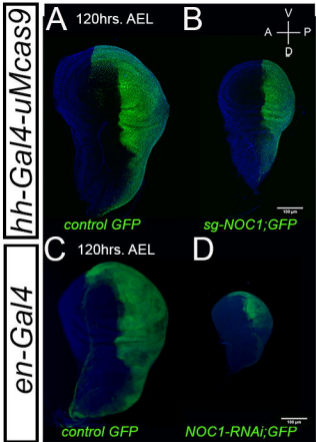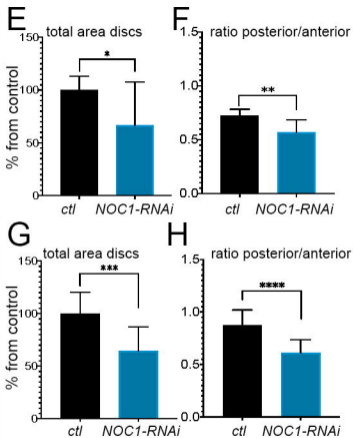

Figure 7
